# Supplementary material for: Cationic dirhodium(ii,ii) complexes for the electrocatalytic reduction of CO2 to HCOOH
Source: Royal Society of Chemistry journal article supplement (doi:10.1039/c6cc03253b), 2016-01-01
Supplement: c6cc03253b1.pdf [file c6cc03253b1.pdf]

## Cationic Dirhodium(II,II) Complexes for the Electrocatalytic Reduction of CO<sub>2</sub> to HCOOH

Suzanne Witt,<sup>a</sup> Travis A. White,<sup>a</sup> Zhanyong Li,<sup>b</sup> Kim R. Dunbar,<sup>\*,b</sup> Claudia Turro<sup>\*,a</sup>

<sup>a</sup>*Department of Chemistry and Biochemistry, The Ohio State University*

<sup>b</sup>*Department of Chemistry, Texas A&M University*

*Corresponding authors:*

Claudia Turro (turro.1@osu.edu) and Kim R. Dunbar (dunbar@mail.chem.tamu.edu)

### SUPPORTING INFORMATION

#### Experimental

**Materials.** All materials were used as received unless stated otherwise. RhCl<sub>3</sub>·3H<sub>2</sub>O was purchased from Pressure Chemical Company, and electrochemical grade tetrabutylammonium hexafluorophosphate (≥99.0%) was purchased from Fluka Analytical. Triethyl orthoformate (98%) and formic acid (≥95.0%) were purchased from Sigma. 1,10-phenanthroline (99%), 1,10-phenanthroline-5,6-dione (97%), ethylenediamine (≥99.0%), 1,5-cyclooctadiene (≥99.0%), sodium tert-butoxide (97%), silver tetrafluoroborate (98%), *p*-toluidine (≥99.0%), D<sub>2</sub>O (99.9%), and 3-(Trimethylsilyl)-1-propanesulfonic acid sodium salt (DSS) (97%) were purchased from Aldrich Chemical Co. Acetonitrile was purchased from Fischer Scientific and distilled by refluxing over CaH<sub>2</sub> and stored under N<sub>2</sub> prior to use. Ar (99.998%), N<sub>2</sub> (99.998%), N<sub>2</sub>/H<sub>2</sub> (95:5), He (99.999%), He/CO (95:5), and CO<sub>2</sub> (>99.9%) were purchased from Praxair, Inc. (Danbury, CT, USA). <sup>13</sup>CO<sub>2</sub> (%) was purchased from Cambridge Isotopes, Inc. (location). Dipyrido[3,2-*d*:2',3'-*f*]quinoxaline (dpq),<sup>1</sup> [Rh<sub>2</sub>(μ-DToIF)<sub>2</sub>(dpq)<sub>2</sub>][BF<sub>4</sub>]<sub>2</sub><sup>2</sup> (**1**), [Rh<sub>2</sub>(μ-DToIF)<sub>2</sub>(phen)<sub>2</sub>][BF<sub>4</sub>]<sub>2</sub><sup>3</sup> (**2**) and [Ru(bpy)<sub>2</sub>(dpq)][PF<sub>6</sub>]<sub>2</sub><sup>4</sup> were prepared as previously reported.

**Methods and Instrumentation.** Electrochemical measurements were carried out on a BASi model CV-50W voltammetric analyzer (Bioanalytical Systems, Inc.; West Lafayette, IN, USA). Cyclic voltammetry (CV) was performed on solutions of 0.5 mM of the Rh<sub>2</sub> and Ru complexes in 0.1 M TBAPF<sub>6</sub>/CH<sub>3</sub>CN in a glass cell equipped with a glassy carbon disk working electrode (3 mm diameter), a platinum wire counter electrode, and a Ag/AgCl (3 M NaCl) reference electrode. The solutions were purged with either N<sub>2</sub> or CO<sub>2</sub> before recording the CV. The concentration of CO<sub>2</sub> in acetonitrile is approximately 0.28 M.<sup>5</sup>

Bulk electrolysis experiments were carried out in a custom built, air tight, two compartment bulk electrolysis cell. The working compartment contained a graphite rod working electrode (Graphtek LLC; Buffalo Grove, IL, USA) and a Ag/AgCl (3 M NaCl) reference electrode. A platinum wire counter electrode was placed in the auxiliary compartment, which was separated from the working compartment by a fine glass frit. A 3 mL solution of 0.5 mM Rh<sub>2</sub> complex and 3 M H<sub>2</sub>O in 0.1 M TBAPF<sub>6</sub>/CH<sub>3</sub>CN was placed in the working compartment and the auxiliary compartment was filled with 0.1 M TBAPF<sub>6</sub>/CH<sub>3</sub>CN. Both compartments were purged with CO<sub>2</sub> for 20 minutes, then electrolyzed at each potential for a total of 3 hours. At the end of the electrolysis time, a 200 μL sample of the 37 mL headspace was removed from the working compartment using a Hamilton gastight syringe and injected into a Shimadzu GC-2014 equipped with a 5Å molecular sieve packed column (6 ft long x 1/8 in o.d. x 2.1 mm i.d.) and TCD-2014 thermal conductivity detector to quantify H<sub>2</sub> and CO evolution. The GC conditions for H<sub>2</sub> detection were as follows: injection temperature, 41°C; column temperature, 30 °C; detector temperature, 150 °C; detector current, 60 mA; gas flow, 25 mL/min; Ar carrier

gas. H<sub>2</sub> was quantified using an external calibration curve. For CO detection, the GC conditions were as follows: injection temperature, 41 °C; column temperature, 30 °C; detector temperature, 150 °C; detector current, 150 mA; gas flow, 25 mL/min; He carrier gas. The reaction mixture was then evaporated and reconstituted in D<sub>2</sub>O to extract HCOOH. The HCOOH produced was quantified on a Bruker DPX 400 MHz NMR instrument using a DSS internal standard.

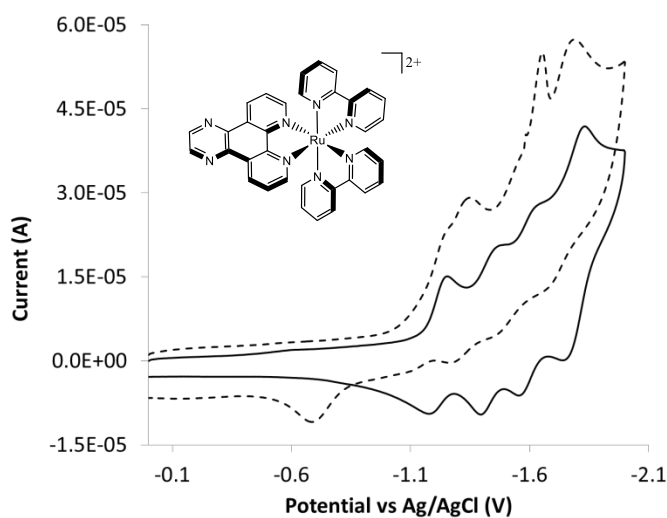

**Figure S1:** Cyclic voltammograms of 0.5 mM [Ru(bpy)<sub>2</sub>(dpq)]<sup>2+</sup> in 0.1 M TBAPF<sub>6</sub>/CH<sub>3</sub>CN deoxygenated with N<sub>2</sub> (solid line) or CO<sub>2</sub> (dashed line). Glassy carbon working electrode, Pt wire counter electrode, Ag/AgCl reference electrode, and scan rate = 100 mV/s.

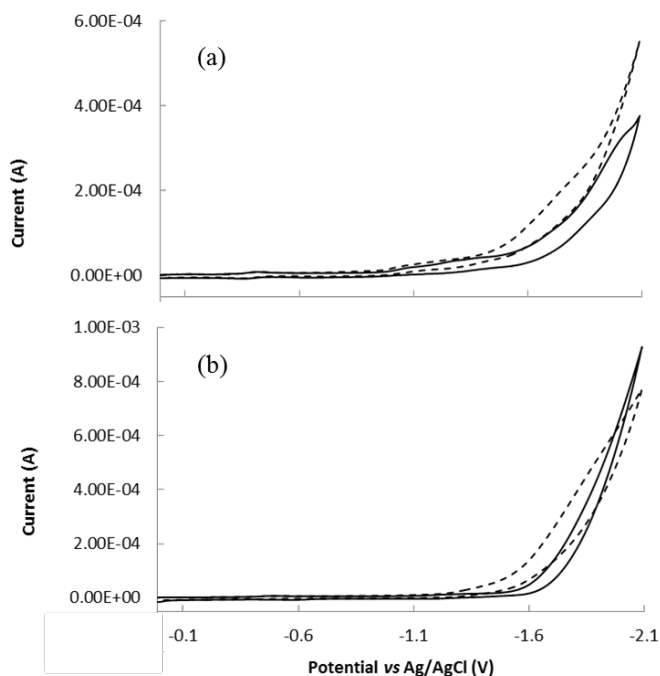

**Figure S2:** Cyclic voltammograms of 0.5 mM **1** (a) and **2** (b) with added 3 M H<sub>2</sub>O in 0.1 M TBAPF<sub>6</sub>/CH<sub>3</sub>CN deoxygenated with N<sub>2</sub> (solid line) or CO<sub>2</sub> (dashed line). Glassy carbon working electrode, Pt wire counter electrode, Ag/AgCl reference electrode, and scan rate = 100 mV/s.

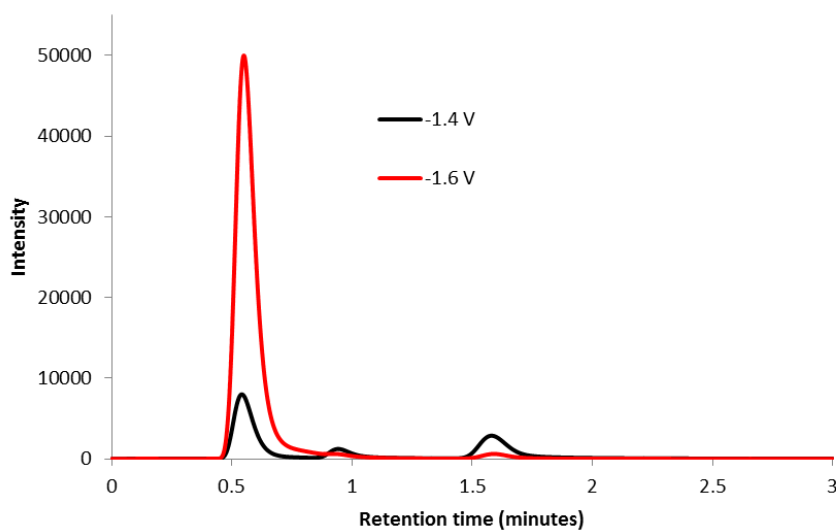

**Figure S3:** Gas chromatogram of a 200 µL sample of headspace after 3 hours of bulk electrolysis of **1** at -1.40 V (black) and -1.60 V (red) in 0.1 M TBAPF<sub>6</sub>/CH<sub>3</sub>CN in the presence of 3 M H<sub>2</sub>O and

CO<sub>2</sub>. H<sub>2</sub> appears at ~0.55 min. The smaller peaks at ~0.93 and ~1.6 min are for trace amounts of O<sub>2</sub> and N<sub>2</sub>, respectively.

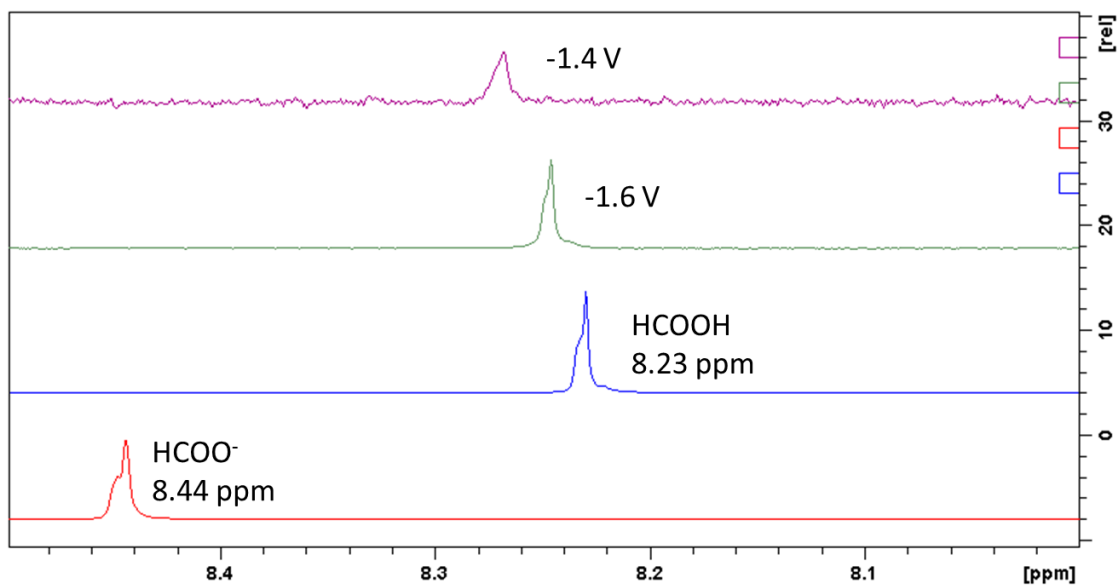

**Figure S4:** <sup>1</sup>H NMR spectra of the reaction mixture of **2** after three hours of bulk electrolysis at -1.40 V (purple) and -1.60 V (green) in 0.1 M TBAPF<sub>6</sub>/CH<sub>3</sub>CN with 3 M H<sub>2</sub>O under CO<sub>2</sub> compared to standard samples of formic acid (blue) and potassium formate (red). The reaction mixture was evaporated and then reconstituted in D<sub>2</sub>O to extract the product. The peak for formic acid occurs at ~8.23 ppm, while the formate anion occurs at ~8.44 ppm vs a DSS internal standard.

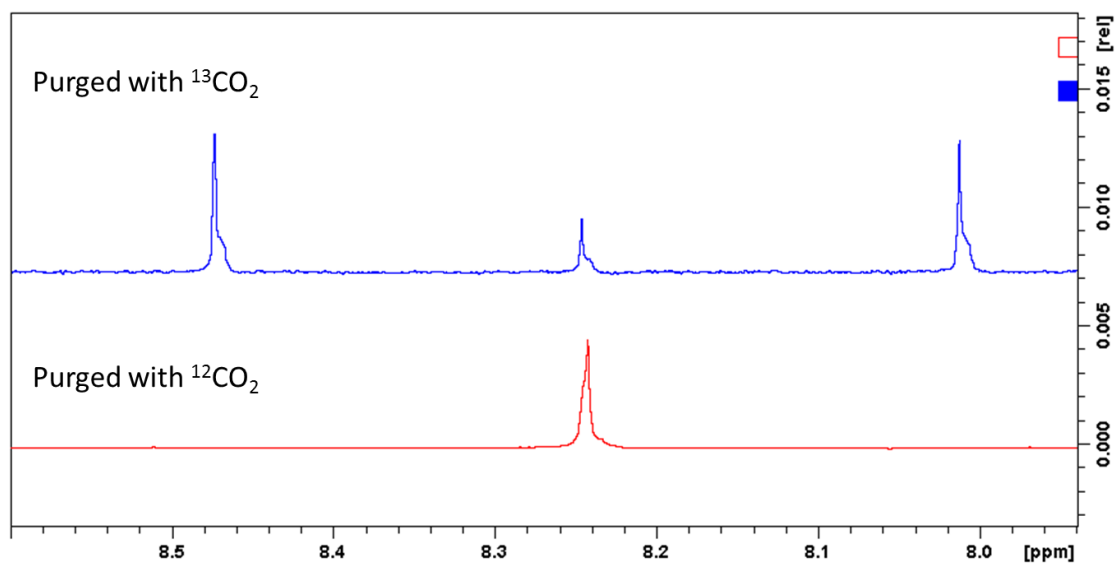

**Figure S5:**  $^1\text{H}$  NMR spectra of the reaction mixture of **2** after three hours of bulk electrolysis at -1.6 V in 0.1 M TBAPF<sub>6</sub>/ACN with 3 M H<sub>2</sub>O under CO<sub>2</sub> (red) or  $^{13}\text{CO}_2$  (blue). The singlet for HCOOH occurs at  $\sim 8.23$  ppm, and the doublet for H $^{13}\text{COOH}$  occurs at the same chemical shift with a J coupling constant of  $\sim 185$  Hz. Chemical shifts are reported vs a DSS internal standard.

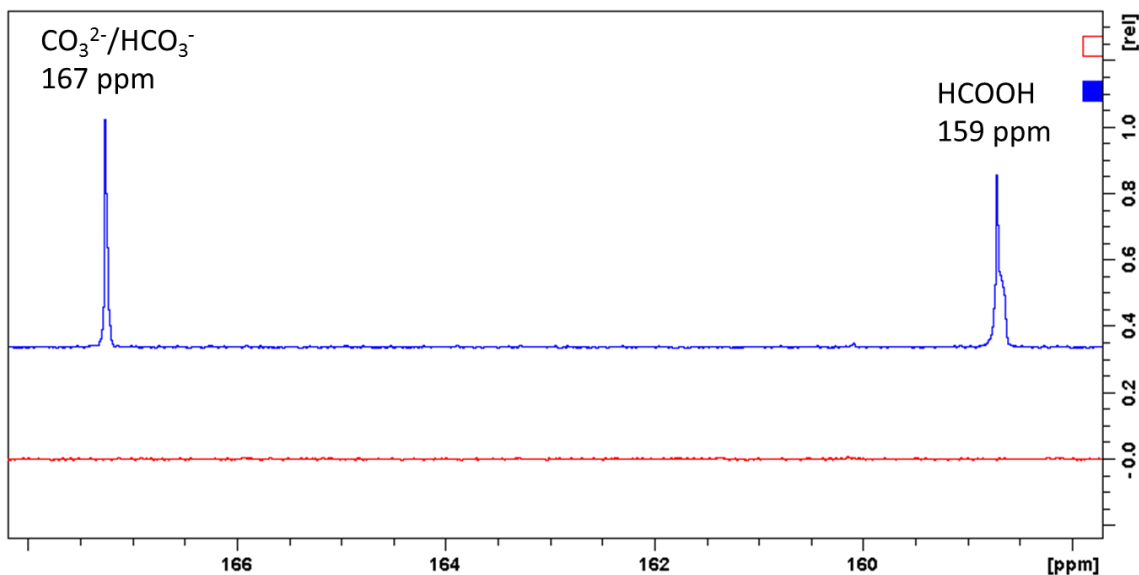

**Figure S6:**  $^{13}\text{C}$  NMR spectra of the reaction mixture of **2** before (red) and after (blue) three hours of bulk electrolysis at -1.6 V in 0.1 M TBAPF<sub>6</sub>/ACN with 3 M H<sub>2</sub>O under  $^{13}\text{CO}_2$ . The peak for carbonate appears at  $\sim 167$  ppm and the peak for HCOOH appears at  $\sim 159$  ppm. Chemical shifts are reported vs a C<sub>6</sub>D<sub>6</sub> internal standard.

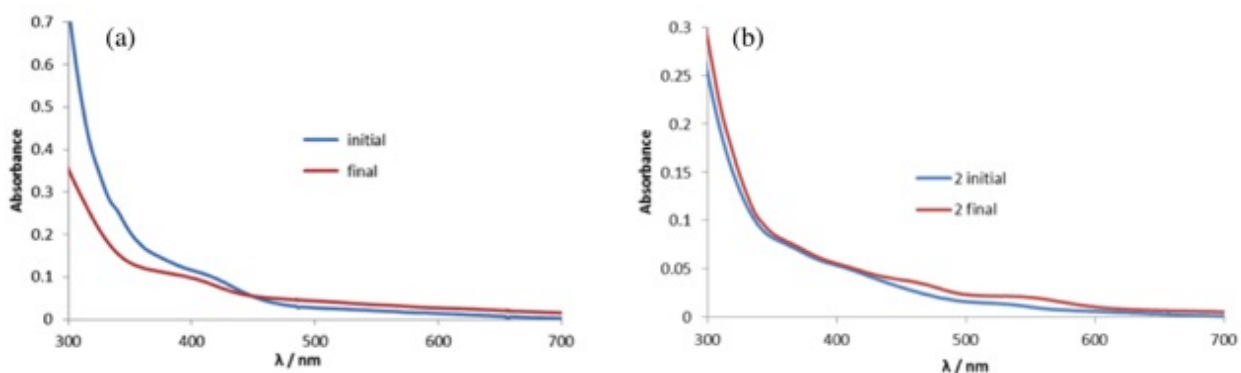

**Figure S7:** UV-Vis absorption spectra of (a) **1** and (b) **2** before (blue) and after (red) bulk electrolysis at -1.6 V in 0.1 M TBAPF<sub>6</sub>/ACN with 3 M H<sub>2</sub>O under CO<sub>2</sub>.

## Details of control experiments

Bulk electrolyses under identical conditions in the absence of catalyst were conducted as control experiments. At  $-1.4$  V, 1.86 C of charge was passed, generating small amounts of  $H_2$  (5.04  $\mu\text{mol}$ ) and HCOOH (0.302  $\mu\text{mol}$ ), respectively. Similarly, 7.98 C of charge was passed at  $-1.6$  V, generating and 24.3  $\mu\text{mol}$  of  $H_2$  and 2.31  $\mu\text{mol}$  of HCOOH. These values were subtracted from those obtained from bulk electrolysis in the presence of catalyst in order to calculate TON values and %FE.

Bulk electrolysis at  $-1.6$  V under  $N_2$  in the presence of catalyst was performed to confirm  $CO_2$  as the source of carbon for HCOOH formation. In these experiments, 25.5 C of charge was passed and 93.4  $\mu\text{mol}$  of  $H_2$  and 0.387  $\mu\text{mol}$  of HCOOH were detected when **1** was used as the catalyst. For **2**, 48.9 C of charge was passed and 197  $\mu\text{mol}$  of  $H_2$  and 2.19  $\mu\text{mol}$  of HCOOH were detected.

## References

- 
- S1 J. G. Collins, A. D. Sleeman, J. R. Aldrich-Wright, I. Greguric, and T. W. Hambley, *Inorg. Chem.* 1998, **37**, 3133-3141.
- S2 Z. Li, N.A. Leed, N.M. Dickson-Karn, K.R. Dunbar, and C. Turro, *Chem. Sci.*, 2014, **5**, 727-737.
- S3 H. T. Chifotides, K. V. Catalan, and K. R. Dunbar, *Inorg. Chem.*, 2003, **42**, 8739-8747.
- S4 A. Delgadillo, P. Romo, A. M. Leiva, and B. Loeb, *Helv. Chim. Acta*, 2003, **86**, 2110-2120.
- S5 Y. Tomita, S. Teruya, O. Koga, and Y. Hori, *J. Electrochem. Soc.*, 2000, **147**, 4164-4167.
